# Supplementary material for: Slk19 clusters kinetochores and facilitates chromosome bipolar attachment
Source: PubMed Central journal article supplement — Mol Biol Cell. 2013 Mar 1;24(5):566–77. doi: 10.1091/mbc.E12-07-0552 (PMC3583661; doi:10.1091/mbc.e12-07-0552), 2013-03-01

## Supplemental Information:

### Supplemental figure legends

**Figure S1. Yeast kinetochores form clusters during the cell cycle.** *MTW1-GFP TUB1-mCherry* cells were arrested in G<sub>1</sub> phase and then transferred to an agarose pad on a microscope slide for live-cell imaging at 25°C. The localization of kinetochore (Mtw1-GFP) and the spindle morphology (Tub1-mCherry) in a representative cell are shown.

**Figure S2. The kinetochore protein foci are functional kinetochores.** G<sub>1</sub>-arrested *CEN4-GFP NUF2-mCherry* cells were released into 25°C YPD medium containing 20 µg/ml nocodazole. Cells were harvested after 120 min and the images were acquired by confocal microscopy. The images show the co-localization of *CEN4-GFP* with either the larger or the smaller Nuf2-mCherry focus.

**Figure S3. Yeast cohesion mutants do not show a dramatic kinetochore clustering defect.**

**A.** G<sub>1</sub>-arrested WT or *GAL-SCC1 (MCD1)* cells with *MTW1-GFP TUB1-mCherry* were released from galactose medium into glucose medium containing 20µg/ml of nocodazole to repress Scc1 expression and disrupt the spindle structure. The cells were harvested after 120 min incubation at 25°C and the number of Mtw1-GFP foci was counted. The average of three independent experiments is shown. **B.** G<sub>1</sub>-arrested WT, *ctf8Δ*, *ctf18Δ*, and *dcc1Δ* mutants with *MTW1-GFP* were released into YPD media containing 20 µg/ml nocodazole. Cells were harvested after 120 min incubation at 25°C and the number of Mtw1-GFP foci in each cell was counted using fluorescence microscopy. For each sample, at least 100 cells were counted and the percentage of cells with different number of Mtw1-GFP foci is shown on the top. Some representative images from confocal microscopy are shown at the bottom panel to indicate the distribution of Mtw1-GFP.

**Figure S4. *slk19*Δ mutants do not show kinetochore clustering defect during an undisturbed cell cycle.** G<sub>1</sub>-arrested *slk19*Δ mutant cells were transferred onto an agarose pad on a microscope slide to perform live-cell imaging at 25°C. The spindle structure (Tub1-mCherry) and the kinetochore (Mtw1-GFP) signal in a representative *slk19*Δ cell are shown.

**Figure S5. Kinetochore mutants *ydr532*Δ and *ctf3*Δ did not show obvious kinetochore clustering defect.** WT, *ydr532*Δ, and *ctf3*Δ cells with *MTW1-GFP* were first arrested in G<sub>1</sub> phase and then released into YPD medium containing 20 μg/ml nocodazole. After incubation at 25°C for 120 min, the cells were fixed for fluorescence microscopy. The percentage of cells with different number of GFP foci is shown on the top panel after counting for more than 100 cells for each sample. The bottom panel shows the localization of Mtw1-GFP in some representative cells.

**Figure S6. The kinetochore clustering defect in *slk19*Δ mutant cells is not a consequence of compromised mitotic exit pathway.** G<sub>1</sub>-arrested WT, *slk19*Δ, and *spo12*Δ mutant cells with *MTW1-GFP* were released into YPD media containing 20 μg/ml nocodazole. Cells were harvested after 120 min incubation at 25°C and the number of Mtw1-GFP foci per cell was counted using fluorescence microscopy. For each sample, more than 100 cells were counted. The percentage of cells with different GFP foci is shown on the top. Confocal microscopy was used to project representative maximum intensity images (bottom).

**Figure S7. The expression of Slk19 proteins from bacteria.** Left: Coomassie blue staining of SDS-PAGE gel of cleared lysates from bacteria expressing pET-20b(+) (vector only), pET-Slk19-His, pET-Slk19-HA-His, or pET-Slk19-Myc-His. Right: Coomassie blue staining of SDS-PAGE gel of purified pET-Slk19-His, pET-Slk19-HA-His, or pET-Slk19-Myc-His. The samples

of the purified proteins were also tested by Western blot analysis using anti-HA and anti-Myc antibodies.

**Figure S8. *slk19* mutants exhibit separated sister centromeres in the absence of spindle structure.** **A.** *slk19* $\Delta$  mutants show separated sister centromeres.  $G_1$ -arrested WT and *slk19* $\Delta$  cells in *TUB1-mCherry* background with either *CEN4-GFP* or GFP-marked *URA3* locus (*URA3-GFP*) were released into YPD containing 20  $\mu$ g/ml nocodazole for 120 min at 25°C. Confocal microscopy was used to project maximum intensity images (right panel). More than 100 cells were counted for the percentage of cells with separated GFP dots and the average of three independent experiments is shown. The scale bar represents 3 $\mu$ m. The arrow indicates a cell with separated *CEN4-GFP* dots. **B.** *slk19* $\Delta$  mutant cells fail to keep excised sister *CEN4-GFP* together. WT and *slk19* $\Delta$  strains with two recombination sites (RS) flanking the *CEN4-GFP* were constructed. The strains with a vector or the *P<sub>GAL</sub>Recombinase* (*P<sub>GAL</sub>Recom*) were grown up in raffinose at 25°C until log phase. Cells arrested in  $G_1$  were released into medium containing galactose and 20  $\mu$ g/ml nocodazole and incubated at 30°C to induce the expression of the recombinase. After 150 min, cells were harvested, fixed and the separation of *CEN4-GFP* dots was examined using fluorescence microscopy. More than 100 cells were counted for each experiment and shown is the average for three separate experiments. Confocal microscopy was used to project representative maximum intensity images (right). The arrow indicates a cell with fully separated *CEN4-GFP* dots. The scale bar = 3  $\mu$ m.

**Table S1: Strains used in this study**

| <b>Stains</b> | <b>Relevant genotypes</b>                                                                                                                                      | <b>Source</b> |
|---------------|----------------------------------------------------------------------------------------------------------------------------------------------------------------|---------------|
| Y300          | <i>MATa trp1-1 ura3-1 his3-11,15 leu2-3,112 ade2-1 can1-100</i>                                                                                                | Lab stock     |
| Y308          | <i>MATa slk19Δ::HIS3</i>                                                                                                                                       | Uhlmann Lab   |
| 2588-7-4      | <i>MATa MTW1-GFP::HIS3 TUB1-mCherry::URA3</i>                                                                                                                  | This study    |
| 2588-2-2      | <i>MATa MTW1-GFP::HIS3 TUB1-mCherry::URA3 slk19Δ::HIS3</i>                                                                                                     | This study    |
| 2694-2-4      | <i>MATa SPC42-mApple::HIS3 MTW1-GFP::HIS3</i>                                                                                                                  | This study    |
| 2694-1-3      | <i>MATa SPC42-mApple::HIS3 MTW1-GFP::HIS3 cdc13-1</i>                                                                                                          | This study    |
| 2763-5-4      | <i>MATa scc1-73 MTW1-GFP::HIS3 TUB1-mCherry::URA3</i>                                                                                                          | This study    |
| 2003-1-4      | <i>MATa kre28::KanMX MTW1-GFP::HIS3 bar1</i>                                                                                                                   | This study    |
| 2492-5-2      | <i>MATa ctf3Δ::KanMX MTW1-GFP::HIS3 TUB1-mCherry::URA3</i>                                                                                                     | This study    |
| 2669-1-1      | <i>MATa promURA3::tetR::GFP::LEU2 CENIV::tetOX448::URA3 CENV::tetOX448::HIS3 TUB1-mCherry::URA3</i>                                                            | This study    |
| 2668-2-3      | <i>MATa promURA3::tetR::GFP::LEU2 CENIV::tetOX448::URA3 CENV::tetOX448::HIS3 TUB1-mCherry::URA3 slk19Δ::HIS3</i>                                               | This study    |
| 900-8-1       | <i>MATa spo12Δ::KanMX</i>                                                                                                                                      | Lab stock     |
| YYW187        | <i>MATa mad1Δ::HIS3</i>                                                                                                                                        | Lab stock     |
| 2019-8-1      | <i>MATa PDS1-18myc::LEU2 slk19Δ::HIS3</i>                                                                                                                      | Lab stock     |
| JBY649        | <i>MATa PDS1-18myc::LEU2</i>                                                                                                                                   | Bachant Lab   |
| YYW141        | <i>MATa promURA3::tetR::GFP::LEU2 CENIV::tetOX448::URA3 TUB1-mCherry::URA3</i>                                                                                 | Lab stock     |
| 2152-13-1     | <i>MATa promURA3::tetR::GFP::LEU2 CENIV::tetOX448::URA3 TUB1-mCherry::URA3 slk19Δ::HIS3</i>                                                                    | This study    |
| 2257-5-2      | <i>MATa promURA3::tetR::GFP::LEU2 ura3::tetOX448::URA3 slk19Δ::HIS3</i>                                                                                        | This study    |
| 172-1-2       | <i>MATa promURA3::tetR::GFP::LEU2 ura3::tetOX448::URA3</i>                                                                                                     | Lab stock     |
| 543-5-3       | <i>MATa promURA3::tetR::GFP::LEU2 TELV::tetOX448::URA3</i>                                                                                                     | Lab stock     |
| YYW305        | <i>MATa RS::HIS3 (5.6kb-CENIV) RS::KAN (6.8kb + CENIV) promURA3::tetR::GFP::LEU2 CENIV::tetOX448::URA3 (p1217 vector)</i>                                      | This study    |
| YYW308        | <i>MATa RS::HIS3 (5.6kb-CENIV) RS::KAN (6.8kb + CENIV) promURA3::tetR::GFP::LEU2 CENIV::tetOX448::URA3 (P<sub>GAL</sub>R-R-Recombinase::TRP1)</i>              | This study    |
| YYW306        | <i>MATa RS::HIS3 (5.6kb -CENIV) RS::KanMX (6.8kb + CENIV) promURA3::tetR::GFP::LEU2 CENIV::tetOX448::URA3 slk19Δ::HIS3 (p1217 vector)</i>                      | This study    |
| YYW307        | <i>MATa RS::HIS3 (5.6kb-CENIV) RS::KAN (6.8kb + CENIV) promURA3::tetR::GFP::LEU2 CENIV::tetOX448::URA3 (P<sub>GAL</sub>R-R-Recombinase::TRP1) slk19Δ::HIS3</i> | This study    |
| 1091-5-3      | <i>MATa cdc13-1 promURA3::tetR::GFP::LEU2 CENIV::tetOX448::URA3 TUB1-mCherry::URA3</i>                                                                         | Lab stock     |
| 2032-14-1     | <i>MATa cdc13-1 promURA3::tetR::GFP::LEU2 CENIV::tetOX448::URA3 TUB1-mCherry::URA3 slk19Δ::HIS3</i>                                                            | This study    |
| 2083-9-3      | <i>MATa cdc13-1 promURA3::tetR::GFP::LEU2 CENIV::tetOX448::URA3 TUB1-mCherry::URA3 sgo1Δ::KAN</i>                                                              | This study    |
| 2315-26-2     | <i>MATa cdc13-1 promURA3::tetR::GFP::LEU2 CENIV::tetOX448::URA3 sgo1Δ::KanMX slk19Δ::HIS3</i>                                                                  | This study    |
| 2650-1-3      | <i>MATa scc1-73 promURA3::tetR::GFP::LEU2 CENV::tetOX448::HIS3 TUB1-mCherry::URA3</i>                                                                          | This study    |
| 2281-2-4      | <i>MATa scc1-73 promURA3::tetR::GFP::LEU2 CENV::tetOX448::HIS3 TUB1-mCherry::URA3 slk19Δ::HIS3</i>                                                             | This study    |
| 2847-4-1      | <i>MATa scc1-73 promURA3::tetR::GFP::LEU2 CENV::tetOX448::HIS3 TUB1-mCherry::URA3 spo12::KanMX</i>                                                             | This study    |
| YYW277-1      | <i>MATa/a SLK19-13myc::Sphis5<sup>+</sup>/SLK19</i>                                                                                                            | This study    |
| YYW314        | <i>MATa/a SLK19-13myc::Sphis5<sup>+</sup>/SLK19-6HA::URA3</i>                                                                                                  | This study    |
| 934-1-4       | <i>MATa CEN4-GFP::URA3, LEU2 NUF2-mCherry</i>                                                                                                                  | Lab stock     |
| 920-24-1      | <i>MATa spo12::KAN MTW1-GFP::HIS3</i>                                                                                                                          | Lab stock     |
| 777-2-2       | <i>MATa TUB1-GFP:URA3</i>                                                                                                                                      | Lab stock     |
| 2582-4-1      | <i>MATa TUB1-GFP:URA3 slk19Δ::HIS3</i>                                                                                                                         | This study    |
| 891-7-1       | <i>MATa TUB1-GFP:URA3 spo12Δ::KanMX</i>                                                                                                                        | Lab stock     |
| 2660-4-3      | <i>MATa GAL-MCD1::KanMX MTW1-GFP::HIS3 TUB1-mCherry::URA3</i>                                                                                                  | This study    |

Richmond et al. Fig. S1

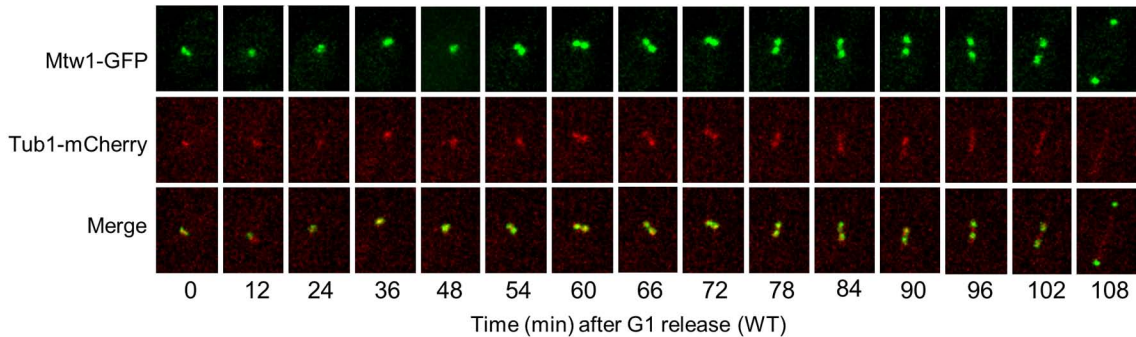

# Richmond et al. Fig. S2

*CEN4*-GFP

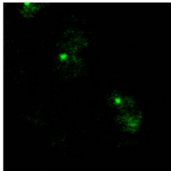

Nuf2-mCherry

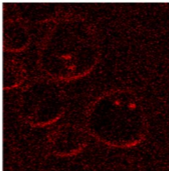

Merge

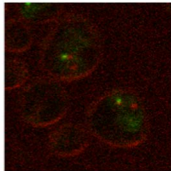

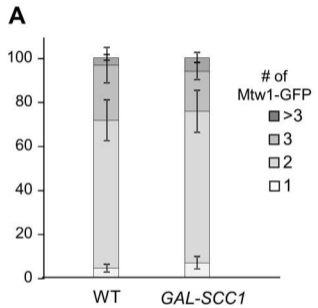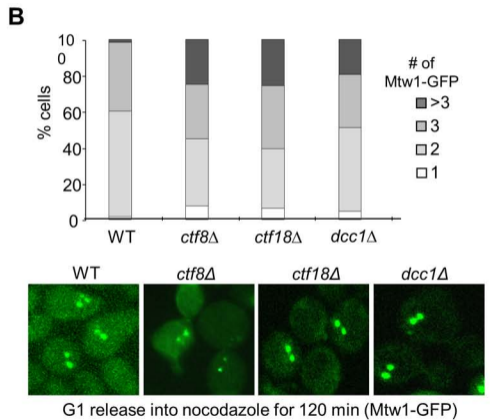

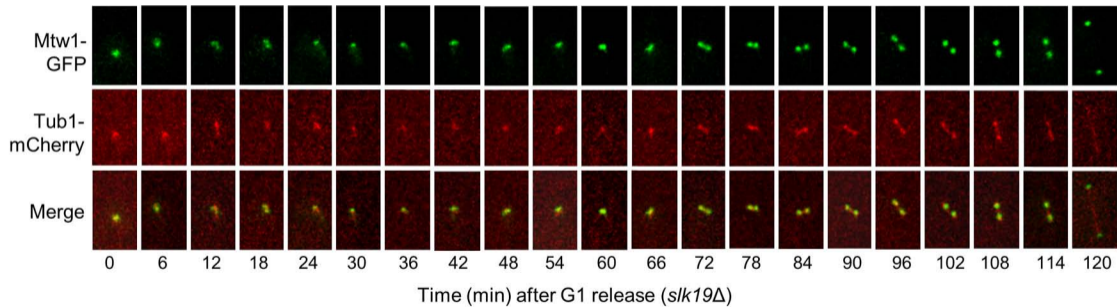



# Richmond et al. Fig. S5

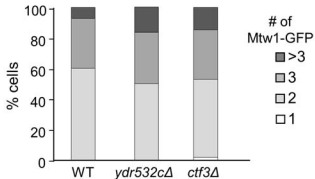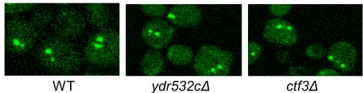

G1 release into nocodazole for 120 min (Mtw1-GFP)

# Richmond et al. Fig. S6

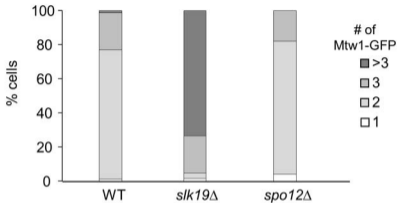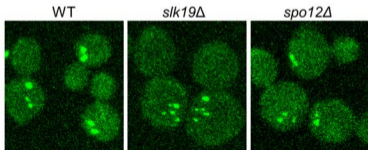

G1 release into nocodazole for 120 min (Mtw1-GFP)

Richmond et al. Fig. S7

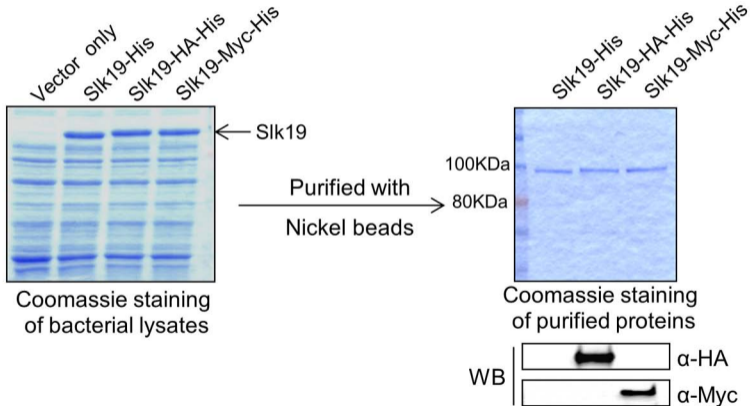

**A**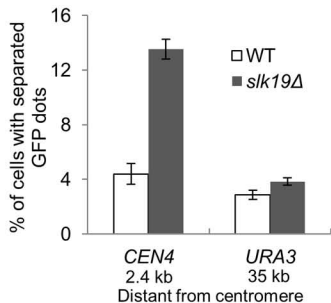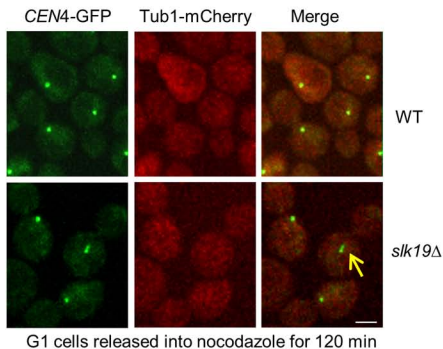**B**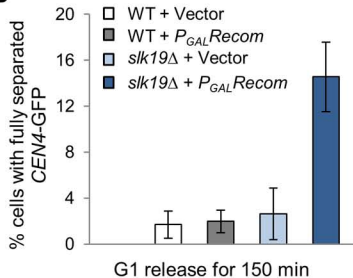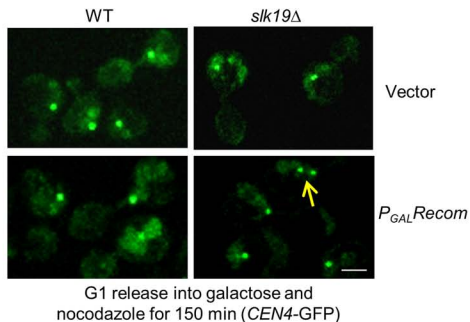

Supplement: supp_E12-07-0552v1_CombinedSupMats.pdf [file supp_E12-07-0552v1_CombinedSupMats.pdf]
